# Supplementary material
Source: PubMed Central journal article supplement (PMC6609542)
Supplement: BPH-176-2750-s001.pdf [file BPH-176-2750-s001.pdf]

## **Supporting information**

**Table S1.** Three molecular dynamics simulations carried out in this study.

| <b>Simulation name</b> | <b>Production run duration (ns)</b> | <b>Box dimension (Å)</b> | <b>Total number of atoms</b> | <b>Number of lipids (POPC/POPE/cholesterol)</b> | <b>Number of water molecules</b> |
|------------------------|-------------------------------------|--------------------------|------------------------------|-------------------------------------------------|----------------------------------|
| Simulation 1           | 700                                 | 90x90x180                | 147359                       | 240 (96/96/48)                                  | 29342                            |
| Simulation 2           | 700                                 | 90x90x180                | 147359                       | 240 (96/96/48)                                  | 29342                            |
| Simulation 3           | 1200                                | 90x90x180                | 147359                       | 240 (96/96/48)                                  | 29342                            |

**Table S2.** Comparison of characteristic distances of the conformational state in pentameric ligand-gated ion channels experimental structures.

| System            | State <sup>a</sup> | Identifier <sup>b</sup> | C-loop opening (Å) <sup>c</sup> | Activation distance (Å) <sup>d</sup> | Pore radius (Å)          |                           |
|-------------------|--------------------|-------------------------|---------------------------------|--------------------------------------|--------------------------|---------------------------|
|                   |                    |                         |                                 |                                      | Position 9' <sup>e</sup> | Position 16' <sup>f</sup> |
| <b>α4β2 nAChR</b> | Resting            | This study              | 13.2 ± 1.0 <sup>g</sup>         | 6.3 ± 0.7 <sup>g</sup>               | 1.6                      | 1.4                       |
|                   | Desensitized       | 5kxi <sup>h</sup>       | 8.2 ± 0.2                       | 3.7 ± 0.0                            | 4.5                      | 5.0                       |
| <b>GlyR1</b>      | Open               | 3jae <sup>i</sup>       | 11.0 ± 0.0                      | 4.4 ± 0.0                            | 7.2                      | 7.2                       |
|                   | Resting            | 3jad <sup>i</sup>       | 14.3 ± 0.0                      | 7.8 ± 0.0                            | 1.3                      | 3.6                       |
| <b>GlyR3</b>      | Desensitized       | 3jaf <sup>f</sup>       | 11.1 ± 0.0                      | 4.2 ± 0.0                            | 7.4                      | 4.3                       |
|                   | Resting            | 5cfb <sup>j</sup>       | 13.6 ± 0.2                      | 8.3 ± 0.1                            | 1.3                      | 3.5                       |
| <b>GLIC</b>       | Desensitized       | 5tio <sup>k</sup>       | 9.1 ± 0.1                       | 4.4 ± 0.0                            | 4.9                      | 8.1                       |
|                   | Open               | 4zzc <sup>l</sup>       | 8.7 ± 0.2                       | 4.4 ± 0.0                            | 3.1                      | 5.5                       |
| <b>GluCl</b>      | Resting            | 4lmj <sup>m</sup>       | 9.4 ± 0.2                       | 6.8 ± 0.1                            | 1.8                      | 2.2                       |
|                   | Resting            | 4tnv <sup>n</sup>       | 11.2 ± 0.3                      | 6.7 ± 0.0                            | 1.3                      | 3.8                       |
| <b>GABAAR</b>     | Desensitized       | 3ri5 <sup>o</sup>       | 10.6 ± 0.1                      | 4.6 ± 0.0                            | 3.1                      | 7.0                       |
|                   | Desensitized       | 4cof <sup>p</sup>       | 10.4 ± 0.1                      | 4.5 ± 0.0                            | 5.6                      | 9.2                       |
| <b>5-HT3</b>      | Resting            | 4pir <sup>q</sup>       | 19.8 ± 0.5                      | 6.3 ± 0.1                            | 2.3                      | 3.3                       |
| <b>ELIC</b>       | Resting            | 2vl0 <sup>r</sup>       | 12.0 ± 0.2                      | 6.3 ± 0.0                            | 1.6                      | 1.0                       |

<sup>a</sup> The activation state as suggested by the authors of the corresponding structures.

<sup>b</sup> The Protein Data Bank identifier of each structure and literature reference.

<sup>c</sup> The opening of the C-loop is defined as the distance between a Cα atom in the C-loop and a Cα atom in a β-strand of the complementary subunit. The residues used to define this distance are: α4 C199–S38 for 5kxi; N219–F79 for 3jad, 3jae and 3jaf; N203–F44 for 5cfb and 5tio; E177–Y23 for 4zzc; E176–Y22 for 4lmj; N196–L35 for 4tnv and 3ri5; A201–D43 for 4cof; I203–I44 for 4pir; and L178–F19 for 2vl0.

<sup>d</sup> The linker distance is defined as the distance between a Cα atom of the β1-β2 inker (the left residue in the bracket) and a Cα atom of the M2-M3 linker (the right residue in the bracket). This activation distance is defined as the distance between: α4 K53–P271 and β2 R48–P263 for 5kxi; T70–P291 for 3jad, 3jae and 3jaf; T54–P275 for 5cfb and 5tio; C33–P247 for 4zzc; C33–P247 for 4lmj; V45–P268 for 4tnv and 3ri5; V53–P273 for 4cof; K54–P274 for 4pir; and L29–P254 for 2vl0.

<sup>e</sup> Residues corresponding to 9' are: α4 L257 and β2 L249 for 5kxi; L277 for 3jad, 3jae and 3jaf; L261 for 5cfb and 5tio; I233 for 4zzc; I232 for 4lmj; L254 for 4tnv and 3ri5; L259 for 4cof; L260 for 4pir; and L239 for 2vl0.

<sup>f</sup> Residues corresponding to 16' are: α4 L264 and β2 L256 for 5kxi; S284 for 3jad, 3jae and 3jaf; S268 for 5cfb and 5tio; I240 for 4zzc; I239 for 4lmj; A261 for 4tnv; and 3ri5, T266 for 4cof, I268 for 4pir, and F246 for 2vl0.

<sup>g</sup> This values is ± standard deviation computed after 400 ns MD simulation for the three simulations; all other values in the table are ± standard deviation computed on all equivalent subunits in the final frame of the MD simulation or in the experimental structures.

- <sup>h</sup> Morales-Perez CL, Noviello CM, Hibbs RE (2016) X-ray structure of the human  $\alpha 4\beta 2$  nicotinic receptor. *Nature* 538(7625):411–415.
- <sup>i</sup> Du J, Lü W, Wu S, Cheng Y, Gouaux E (2015) Glycine receptor mechanism elucidated by electron cryo-microscopy. *Nature* 526(7572):277–280.
- <sup>j</sup> Huang X, Chen H, Michelsen K, Schneider S, Shaffer PL (2015) Crystal structure of human glycine receptor- $\alpha 3$  bound to antagonist strychnine. *Nature* 526(7572):277–80.
- <sup>k</sup> Huang X, et al. (2017) Crystal structures of human glycine receptor  $\alpha 3$  bound to a novel class of analgesic potentiators. *Nat Struct Mol Biol* 24(2):108–113.
- <sup>l</sup> Sauguet L, Fourati Z, Prangé T, Delarue M, Colloc'h N (2016) Structural Basis for Xenon Inhibition in a Cationic Pentameric Ligand-Gated Ion Channel. *PloS One* 11(2):e0149795.
- <sup>m</sup> Gonzalez-Gutierrez G, Cuello LG, Nair SK, Grosman C (2013) Gating of the proton-gated ion channel from *Gloeobacter violaceus* at pH 4 as revealed by X-ray crystallography. *Proc Natl Acad Sci U S A* 110(46):18716–18721.
- <sup>n</sup> Althoff T, Hibbs RE, Banerjee S, Gouaux E (2014) X-ray structures of GluCl in apo states reveal a gating mechanism of Cys-loop receptors. *Nature* 512(7514):333–337.
- <sup>o</sup> Hibbs RE, Gouaux E (2011) Principles of activation and permeation in an anion-selective Cys-loop receptor. *Nature* 474(7349):54–60.
- <sup>p</sup> Miller PS, Aricescu AR (2014) Crystal structure of a human GABAA receptor. *Nature* 512(7514):270–275.
- <sup>q</sup> Hassaine G, et al. (2014) X-ray structure of the mouse serotonin 5-HT<sub>3</sub> receptor. *Nature* 512(7514):276–281.
- <sup>r</sup> Hilf RJC, Dutzler R (2008) X-ray structure of a prokaryotic pentameric ligand-gated ion channel. *Nature* 452(7185):375–379.

**Table S3.** Distance characteristic of the C-loop opening in crystal structures of AChBP in complex with agonists and antagonists ligands.

| Identifier <sup>a</sup> | AChBP strain <sup>b</sup> | C-loop opening distance (Å) <sup>c</sup> | Activity <sup>d</sup> | Ligand                   |
|-------------------------|---------------------------|------------------------------------------|-----------------------|--------------------------|
| 2xz5                    | <i>A. californica</i>     | 9.8                                      | Agonist               | Acetylcholine            |
| 2byq                    | <i>A. californica</i>     | 10.0                                     | Agonist               | Epibatidine              |
| 1uv6                    | <i>L. stagnalis</i>       | 10.1                                     | Agonist               | Carbamylcholine          |
| 1uw6                    | <i>L. stagnalis</i>       | 10.1                                     | Agonist               | Nicotine                 |
| 2wnc                    | <i>A. californica</i>     | 10.3                                     | Agonist               | Tropisetron              |
| 2zjv                    | <i>L. stagnalis</i>       | 10.6                                     | Agonist               | Clothianidin             |
| 4bqt                    | <i>A. californica</i>     | 10.6                                     | Agonist               | Cytisine                 |
| 2wnl                    | <i>A. californica</i>     | 10.7                                     | Agonist               | Anabaseine               |
| 3c84                    | <i>A. californica</i>     | 10.7                                     | Agonist               | Thiacloprid              |
| 2bys                    | <i>A. californica</i>     | 10.4                                     | Agonist/antagonist    | Lobeline                 |
| 4afh                    | <i>C. teleta</i>          | 12.7                                     | Agonist/antagonist    | Lobeline                 |
| 3c79                    | <i>A. californica</i>     | 11.5                                     | Agonist/antagonist    | Imidacloprid             |
| 2zju                    | <i>L. stagnalis</i>       | 12.9                                     | Agonist/antagonist    | Imidacloprid             |
| 4alx                    | <i>L. stagnalis</i>       | 12.7                                     | Antagonist            | DhβE                     |
| 2x00                    | <i>A. californica</i>     | 13.2                                     | Antagonist            | Gymnodimine A            |
| 2xyt                    | <i>A. californica</i>     | 14.6                                     | Antagonist            | <i>d</i> -Tubocurarine   |
| 3peo                    | <i>A. californica</i>     | 14.6                                     | Antagonist            | Metocurine               |
| 2byr                    | <i>A. californica</i>     | 15.0                                     | Antagonist            | Methyllycaconitine       |
| 2wzy                    | <i>A. californica</i>     | 15.0                                     | Antagonist            | 13-desmethyl spirolide C |
| 2pgz                    | <i>A. californica</i>     | 15.8                                     | Antagonist            | Cocaine                  |
| 4ez1                    | <i>A. californica</i>     | 17.6                                     | Antagonist            | α-Conotoxin BuIA         |
| 2br8                    | <i>A. californica</i>     | 18.0                                     | Antagonist            | α-Conotoxin PnIA variant |
| 5jme                    | <i>A. californica</i>     | 18.3                                     | Antagonist            | α-Conotoxin PeIA         |
| 5co5                    | <i>A. californica</i>     | 18.4                                     | Antagonist            | α-Conotoxin GIC          |
| 2c9t                    | <i>A. californica</i>     | 18.6                                     | Antagonist            | α-Conotoxin ImI          |
| 2uz6                    | <i>A. californica</i>     | 18.6                                     | Antagonist            | α-Conotoxin TxIA variant |
| 1yi5                    | <i>L. stagnalis</i>       | 20.0                                     | Antagonist            | α-cobratoxin             |
| 5t90                    | <i>L. stagnalis</i>       | 20.3                                     | Antagonist            | α-Conotoxin LsIA         |

<sup>a</sup> The Protein Data Bank identifier of each structure.

<sup>b</sup> Organism from which the AChBP was originally extracted: *Lymnaea stagnalis*, *Aplysia californica* or *Capitella teleta*

<sup>c</sup> Distance characteristic of the C-loop opening, which is taken between the Cα of C187 and K34 for *Lymnaea stagnalis* AChBP and between the Cα of C183 and T34 for *Aplysia californica* AChBP.

<sup>d</sup> Type of Activity of the ligand on nAChR receptors. Some ligands can be agonists or antagonists depending

of the nAChR subtype.

**Table S4.** Experimental structures and tilt angles represented in Figure 6C.

| Receptor            | State        | Identifier <sup>a</sup> | ECD radial tilt angle<br>(°) <sup>b</sup> | M2 radial tilt angle<br>(°) <sup>c</sup> |
|---------------------|--------------|-------------------------|-------------------------------------------|------------------------------------------|
| nAChR               | Resting      | This study              | 4.61                                      | 2.87                                     |
| nAChR               | Desensitized | 5kxi                    | 0.39                                      | 8.45                                     |
| 5-HT <sub>3</sub>   | Resting      | 4pir                    | 0.97                                      | 5.01                                     |
| 5-HT <sub>3</sub>   | Resting      | 6be1                    | 1.60                                      | 4.01                                     |
| ELIC                | Resting      | 2vl0                    | 0.13                                      | 3.74                                     |
| ELIC                |              | 2yks                    | 0.30                                      | 4.48                                     |
| ELIC                |              | 2yn6                    | 0.14                                      | 3.04                                     |
| ELIC                |              | 2yoe                    | 0.18                                      | 3.26                                     |
| ELIC                |              | 3rqu                    | 0.53                                      | 3.03                                     |
| ELIC                |              | 3rqw                    | 0.94                                      | 3.01                                     |
| ELIC                |              | 3uq4                    | 0.47                                      | 4.64                                     |
| ELIC                |              | 3uq5                    | 0.58                                      | 4.83                                     |
| ELIC                |              | 3uq7                    | 0.51                                      | 4.72                                     |
| ELIC                |              | 3zkr                    | 0.42                                      | 3.30                                     |
| ELIC                |              | 4a97                    | 0.17                                      | 3.54                                     |
| ELIC                |              | 4a98                    | 0.29                                      | 3.06                                     |
| ELIC                |              | 4twd                    | 0.58                                      | 4.92                                     |
| ELIC                |              | 4twf                    | 0.41                                      | 4.12                                     |
| ELIC                |              | 4twh                    | 0.58                                      | 4.52                                     |
| ELIC                |              | 4z90                    | 0.33                                      | 3.20                                     |
| ELIC                |              | 4z91                    | 0.26                                      | 2.90                                     |
| ELIC                |              | 5hej                    | 1.46                                      | 2.95                                     |
| ELIC                |              | 5heo                    | 0.94                                      | 3.43                                     |
| ELIC                |              | 5heu                    | 1.02                                      | 2.68                                     |
| ELIC                |              | 5hew                    | 1.41                                      | 3.35                                     |
| ELIC                |              | 5lg3                    | 1.14                                      | 3.26                                     |
| ELIC                |              | 5lid                    | 1.23                                      | 3.10                                     |
| ELIC                |              | 5sxu                    | 0.37                                      | 2.58                                     |
| ELIC                |              | 5sxv                    | 0.29                                      | 2.55                                     |
| GABA <sub>A</sub> R | Desensitized | 4cof                    | 1.07                                      | 9.86                                     |
| GLIC                | Resting      | 4lmj                    | 8.57                                      | 3.70                                     |
| GLIC                | Desensitized | 5j0z                    | 7.41                                      | 7.18                                     |
| GLIC                | Open         | 4zzc                    | 7.69                                      | 6.59                                     |
| GLIC                | Open         | 5v6n                    | 7.04                                      | 6.90                                     |
| GLIC                |              | 2xq3                    | 7.59                                      | 7.26                                     |
| GLIC                |              | 2xq4                    | 7.63                                      | 6.98                                     |
| GLIC                |              | 2xq5                    | 7.49                                      | 7.19                                     |
| GLIC                |              | 2xq6                    | 7.52                                      | 7.61                                     |

|      |      |      |      |
|------|------|------|------|
| GLIC | 2xq7 | 7.90 | 7.87 |
| GLIC | 2xq8 | 7.52 | 8.52 |
| GLIC | 2xqa | 7.63 | 6.93 |
| GLIC | 3eam | 7.82 | 6.66 |
| GLIC | 3ehz | 7.15 | 7.25 |
| GLIC | 3lsv | 7.73 | 6.69 |
| GLIC | 3p4w | 7.28 | 6.98 |
| GLIC | 3p50 | 7.31 | 6.91 |
| GLIC | 3tlt | 8.00 | 3.30 |
| GLIC | 3tlu | 7.64 | 3.17 |
| GLIC | 3tlv | 7.82 | 2.12 |
| GLIC | 3uu8 | 7.85 | 6.58 |
| GLIC | 4f8h | 7.78 | 6.96 |
| GLIC | 4hfb | 7.88 | 6.66 |
| GLIC | 4hfc | 7.43 | 6.89 |
| GLIC | 4hfd | 7.54 | 6.93 |
| GLIC | 4hfe | 7.80 | 6.86 |
| GLIC | 4hfh | 7.55 | 7.01 |
| GLIC | 4hfi | 7.80 | 6.91 |
| GLIC | 4il4 | 7.72 | 7.10 |
| GLIC | 4il9 | 7.40 | 6.73 |
| GLIC | 4ila | 7.85 | 6.80 |
| GLIC | 4ilb | 7.50 | 7.36 |
| GLIC | 4ile | 7.51 | 6.94 |
| GLIC | 4ire | 7.47 | 7.30 |
| GLIC | 4qh5 | 7.78 | 7.01 |
| GLIC | 4zzb | 7.70 | 2.30 |
| GLIC | 5heg | 7.74 | 4.00 |
| GLIC | 5heh | 7.23 | 7.24 |
| GLIC | 5iux | 8.34 | 7.02 |
| GLIC | 5mur | 7.37 | 6.67 |
| GLIC | 5mvm | 7.28 | 7.35 |
| GLIC | 5mzq | 7.29 | 7.22 |
| GLIC | 5mzr | 7.35 | 7.55 |
| GLIC | 5mzt | 7.31 | 7.49 |
| GLIC | 5v6o | 7.12 | 6.62 |
| GLIC | 6f0i | 8.00 | 6.39 |
| GLIC | 6f0j | 7.83 | 6.47 |
| GLIC | 6f0m | 8.05 | 6.54 |
| GLIC | 6f0n | 8.02 | 6.50 |
| GLIC | 6f0r | 7.25 | 7.11 |



|       |              |      |       |      |
|-------|--------------|------|-------|------|
| GLIC  |              | 6f0u | 7.94  | 6.48 |
| GLIC  |              | 6f0v | 7.44  | 7.08 |
| GLIC  |              | 6f0z | 7.53  | 7.04 |
| GLIC  |              | 6f10 | 8.25  | 7.07 |
| GLIC  |              | 6f11 | 7.64  | 6.97 |
| GLIC  |              | 6f12 | 8.32  | 7.04 |
| GLIC  |              | 6f13 | 7.53  | 6.95 |
| GLIC  |              | 6f15 | 7.50  | 6.99 |
| GLIC  |              | 6f16 | 7.51  | 7.14 |
| GLIC  |              | 6f7a | 10.07 | 2.76 |
| GluCl | Resting      | 4tnv | 11.25 | 0.90 |
| GluCl | Desensitized | 3ri5 | 6.08  | 5.88 |
| GluCl |              | 3rhw | 6.18  | 5.80 |
| GluCl |              | 3ria | 5.86  | 5.53 |
| GluCl |              | 3rif | 5.80  | 5.88 |
| GlyR1 | Resting      | 3jad | 4.95  | 2.81 |
| GlyR1 | Desensitized | 3jaf | 1.51  | 6.44 |
| GlyR1 | Open         | 3jae | 0.92  | 2.55 |
| GlyR3 | Resting      | 5cfb | 5.55  | 4.91 |
| GlyR3 | Desensitized | 5tio | 1.46  | 9.20 |
| GlyR3 |              | 5tin | 1.39  | 8.94 |
| GlyR3 |              | 5vdh | 1.31  | 8.02 |
| GlyR3 |              | 5vdi | 1.25  | 7.87 |

<sup>a</sup> The Protein Data Bank identifier of each structure.

<sup>b</sup> The extracellular domain (ECD) tilt angle averaged over the five subunits of each structure. This angle is defined in Figure 4.

<sup>c</sup> The transmembrane helix 2 (M2) tilt angle averaged over the five subunits of each structure. This angle is defined in Figure 6.

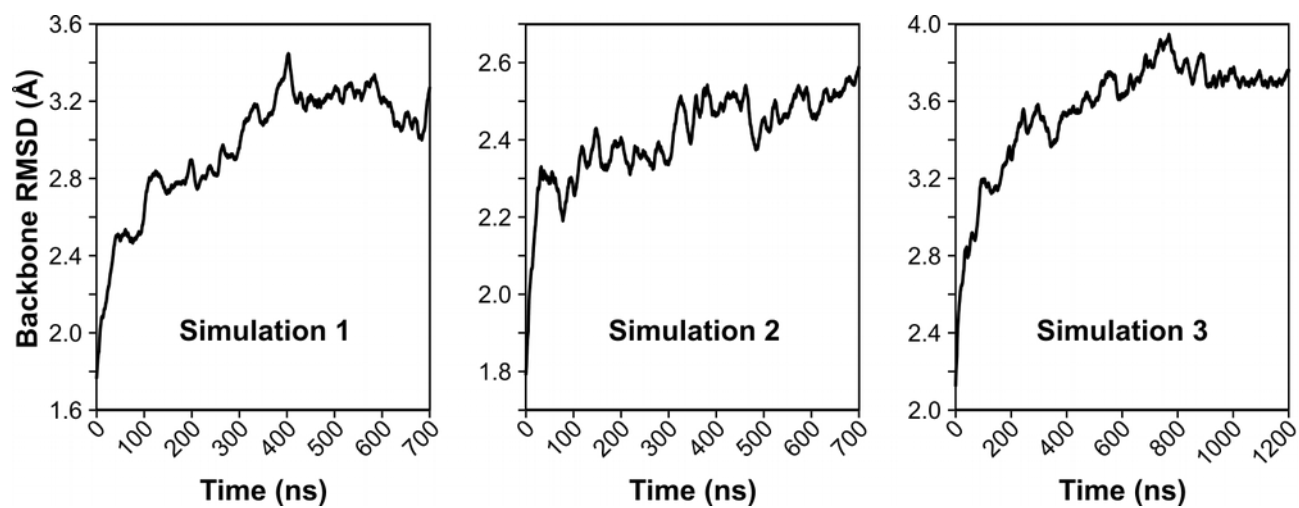

**Figure S1.** Backbone root-mean-square deviation from the initial conformation measured during the production run of the three molecular dynamics simulations.

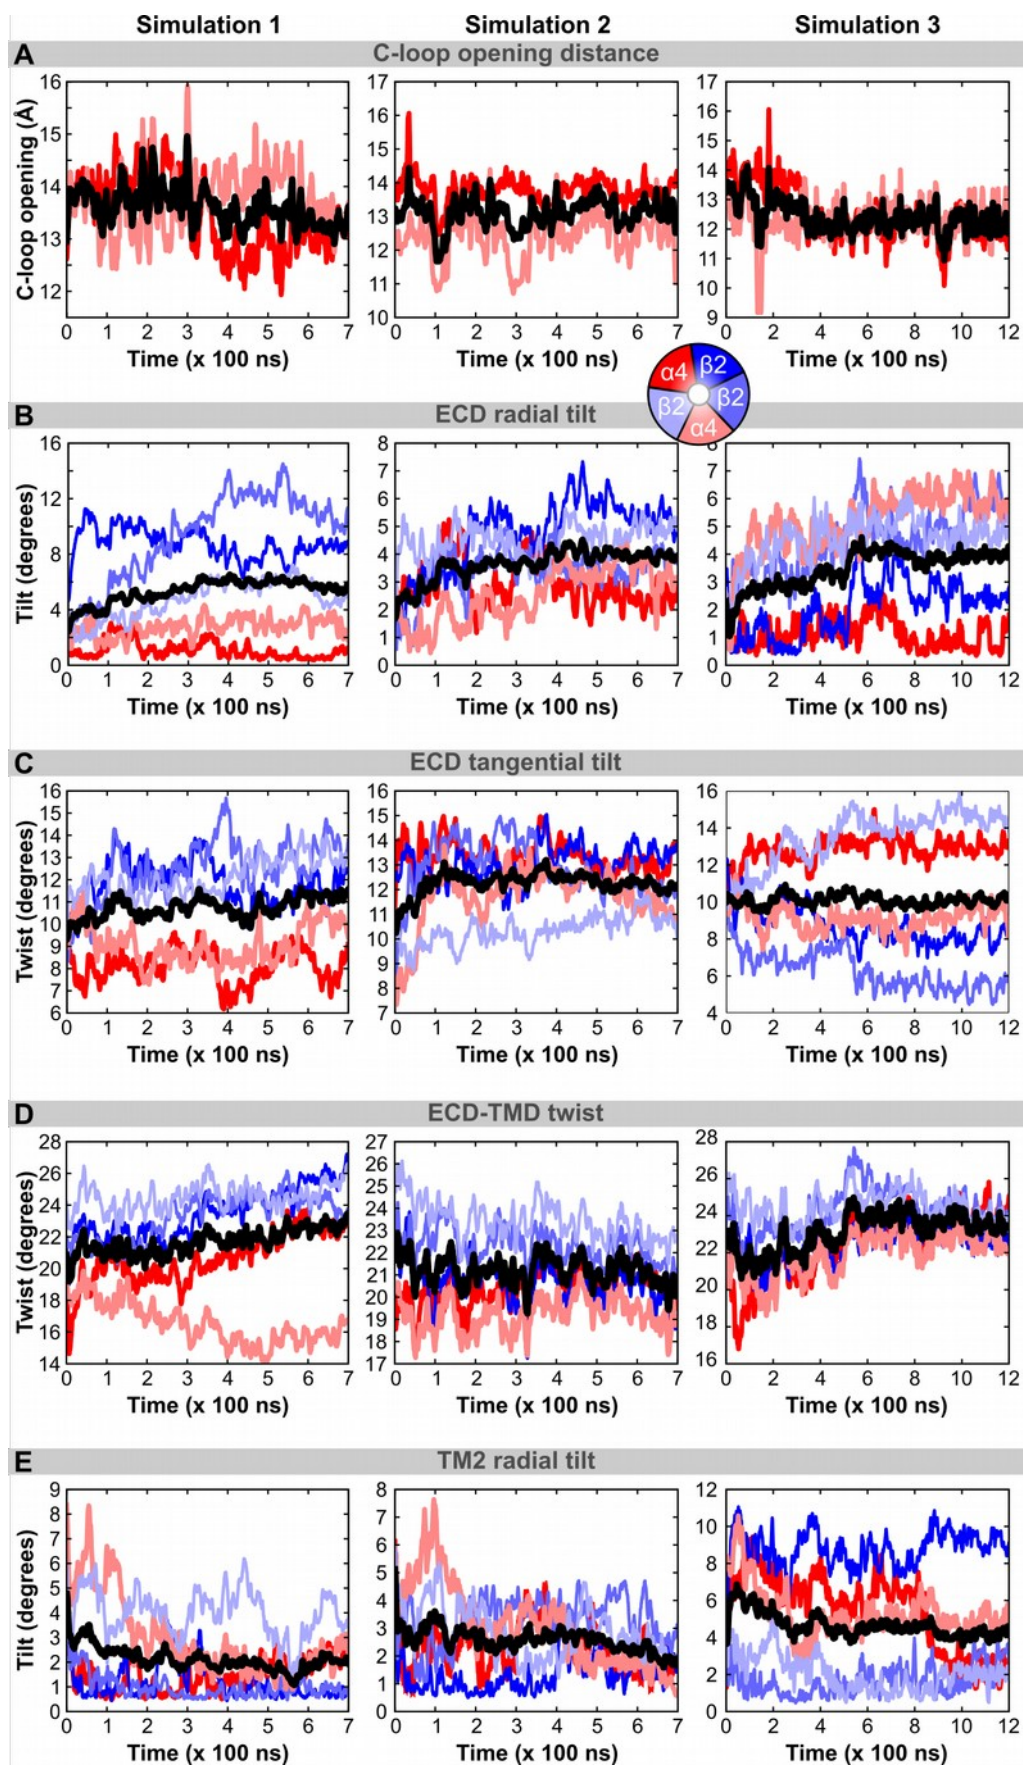

**Figure S2.** Analysis of the change of conformation of each subunit of the  $\alpha 4 \beta 2$  nAChR during the three MD simulations. (A) Change of conformation of the C-loop (defined in Figure 3). (B, C)

*Evolution of the radial and tangential tilt (defined in Figure 4). (D) Evolution of the ECD-TMD twist angle (defined in Figure 4). (E) Evolution of M2 radial tilt angle (defined in Figure 6). The graphics on the left, middle and right are for Simulations 1, 2 and 3, respectively. The red and blue lines represent different subunits as defined in the circular key that represents the arrangement of  $\alpha 4$  and  $\beta 2$  subunits in the receptor.*

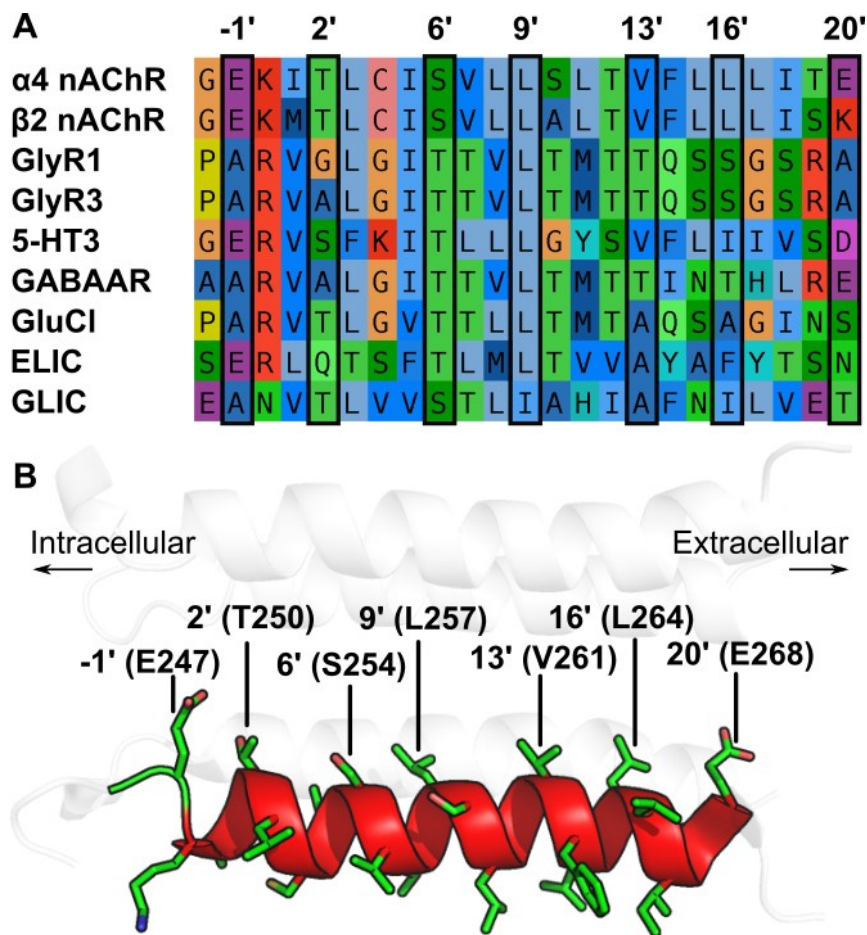

**Figure S3. M2 sequence and structure with identification of positions lining the pore.** (A) Amino acids sequence alignment of the M2 helix of several Cys-loop receptors. The positions lining the pores are boxed. (B) Structure of the M2 helix of the  $\alpha 4$  nAChR subunit with residues lining the pore labelled. The other M2 helices forming the transmembrane pore of the  $\alpha 4\beta 2$  nAChR are represented in transparency. The positions are numbered using the M2 standard numbering from -1' to 20' and the absolute numbering of the positions are indicated between parentheses.

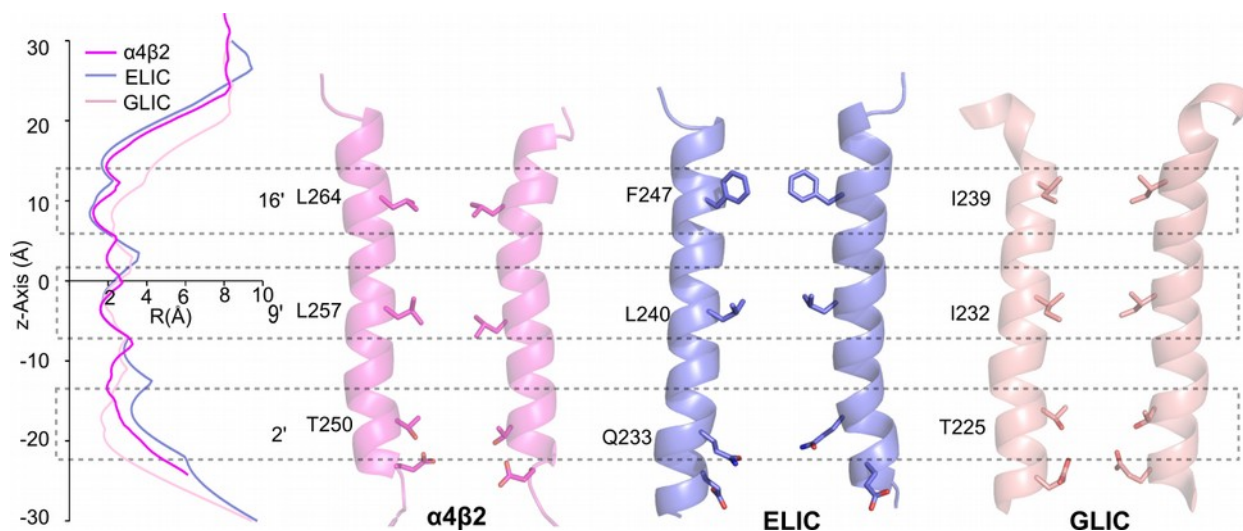

**Figure S4. Comparison of the M2 of  $\alpha 4\beta 2$  nAChR with the corresponding domain of ELIC and GLIC in closed/resting state.** The M2 helix of  $\alpha 4\beta 2$  nAChR (magenta) is from the last frame in 700ns MD simulation of the  $\alpha 4\beta 2$  nAChR bound with DH $\beta$ E; M2 of ELIC and GLIC are corresponding to the M2 of the crystal structure of ELIC (PDB identifier 5gl3) and crystal structure of GLIC (PDB identifier 4lmj), respectively. Orientation of the M2 helix between  $\alpha 4\beta 2$  nAChR, ELIC and GLIC is very similar nearly parallel to the z-axis. The hydrophobic residues at 9' and 16' positions constitute the hydrophobic gate or girdle of the M2 domain of the  $\alpha 4\beta 2$  nAChR, ELIC and GLIC in closed/resting state.
